# Supplementary material for: Pumilio protects Xbp1 mRNA from regulated Ire1-dependent decay
Source: PubMed Central journal article supplement (PMC8948244; doi:10.1038/s41467-022-29105-x), 2022-03-24
Supplement: 41467_2022_29105_MOESM1_ESM.pdf [file 41467_2022_29105_MOESM1_ESM.pdf]

# **Pumilio protects Xbp1 mRNA from regulated Ire1-dependent decay**

Fátima Cairrão<sup>1</sup>, Cristiana C Santos<sup>1</sup>, Adrien Le Thomas<sup>2</sup>, Scot Marsters<sup>2</sup>, Avi Ashkenazi<sup>2</sup> and Pedro M. Domingos<sup>1</sup>

1 - Instituto de Tecnologia Química e Biológica, Universidade Nova de Lisboa, Av. da República, 2780-157 Oeiras, Portugal 2 - Cancer Immunology, Genentech, Inc., 1 DNA Way, South San Francisco, CA 94080, USA

a

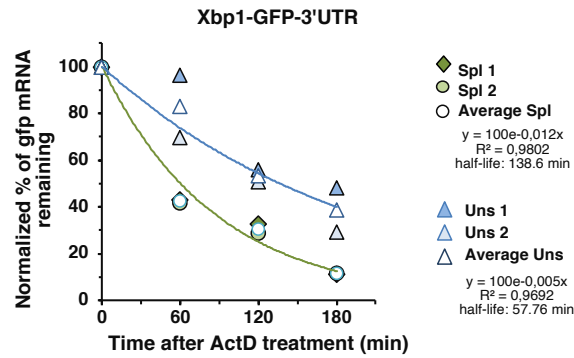

b

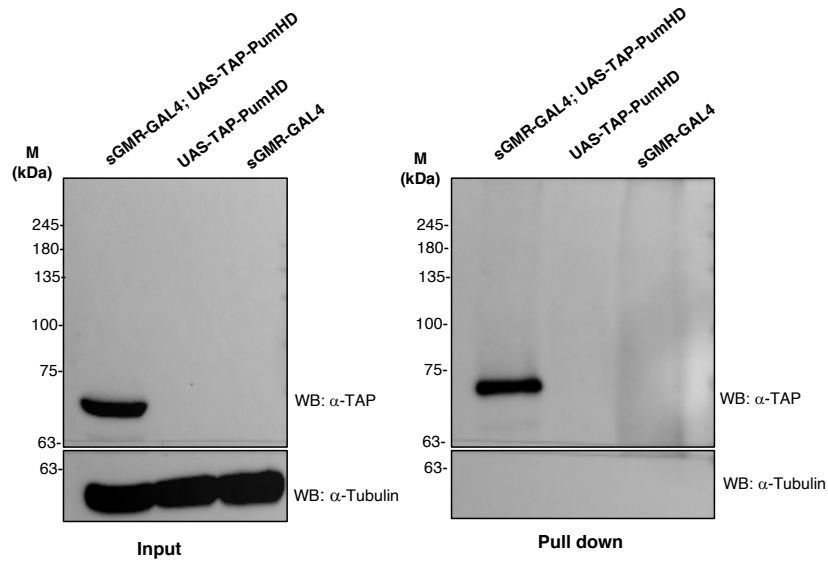

c

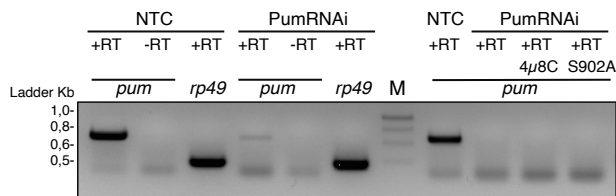

**Supplementary Figure 1 - The 3'UTRs of Xbp1<sup>unspliced</sup> and Xbp1<sup>spliced</sup> differ in their stability effect**

**a)** The stability of the GFP reporters fused with the 3'UTRs of Xbp1<sup>spliced</sup> or Xbp1<sup>unspliced</sup> was assessed by RT-PCR, using primers specific for *gfp* and *rp49* mRNAs (control). The levels of mRNA reporter were normalized to those of *rp49* mRNA, and averages and standard deviations from three independent experiments are plotted. The 3'UTR of Xbp1<sup>unspliced</sup> shows a higher stability effect of the reporter half-life (2 fold stabilization) relative to the spliced form. Data are presented as mean ± SD. Spliced (green, n=2); Unspliced (blue, n=2). n = 2 biological independent experiments.

**b)** Immunoblot from adult *Drosophila* eyes expressing TAP-PumHD (sGMR-GAL4; UAS-TAP-PumHD) and the 2 parental control lines. Both input and pull-down samples were run and probed with anti-TAP and anti-Tubulin (loading control) antibodies. n = 2 independent experiments.

**c)** RT-PCR results from S2 cells treated with PumRNAi or LacZ RNAi (NTC - non-target control) to assay for the efficiency and specificity of PumRNAi treatments, using primers specific for *pumilio* (*pum*) or the loading control *rp49*. RNA samples were treated (+RT) or not (-RT) with reverse transcriptase. M – molecular weight markers. n ≥ 3 of independent experiments.

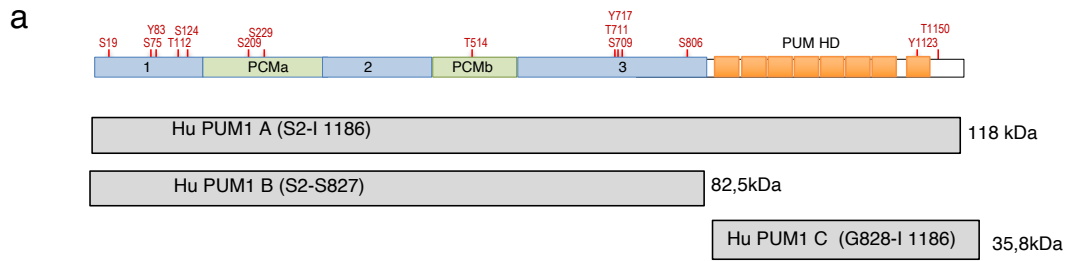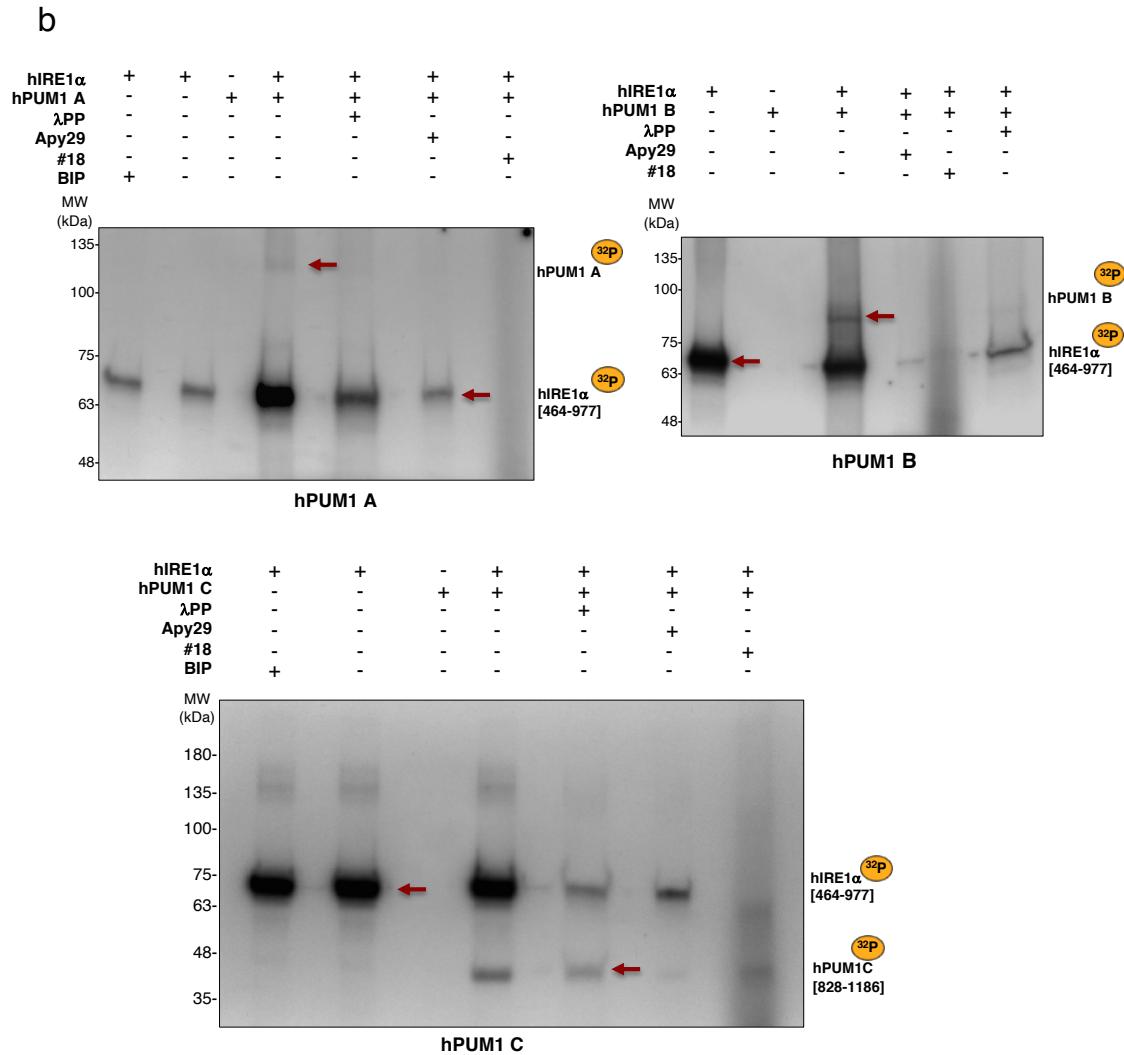

### Supplementary Figure 2 - hIRE1 $\alpha$ KR domain phosphorylates hPUM1 *in vitro*

**a)** Schematic representation of domains and putative phosphorylation sites present in Human PUM1.  
**b)** *in vitro* radioactive kinase assay with  $\gamma$ -[<sup>32</sup>P]ATP of purified hPUM1 forms incubated with hIRE1 $\alpha$  KR domain. The specificity of phosphorylation was monitored by treatment with  $\lambda$ PP or incubation with specific inhibitors of IRE1 kinase activity (Apy29 and compound#18). Arrows express hPUM1 phosphorylated forms corresponding to the expected MW of each purified protein. Treatment with kinase inhibitors decreased the amount of detected radioactive protein bands. n $\geq$ 2 of independent experiments. Source data file is provided.

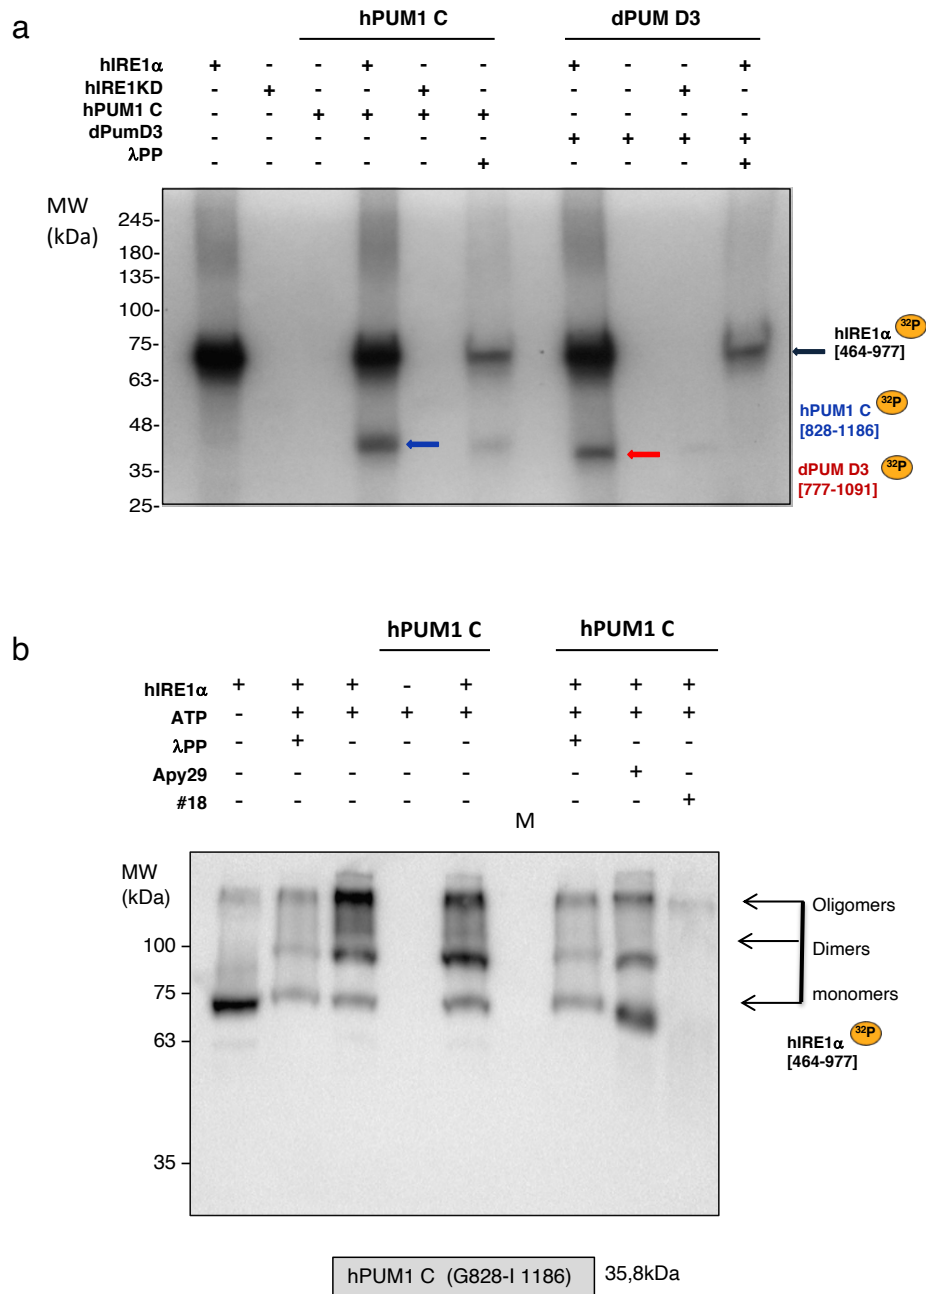

### Supplementary Figure 3 - Validation of *in vitro* phosphorylation hPUM1-C and dPUM-D3

**a)** *In vitro* phosphorylation hPUM1-C domain and dPUM-D3 domain by hIRE1 $\alpha$  KR using the control kinase-dead Ire1 (hIRE1KD, D688N). Assays were conducted as described before. Arrows denote phosphorylated forms of hPUM-C (Blue arrow) and dPUM-D3 purified proteins (red arrow). Auto-phosphorylation of hIRE1 $\alpha$  KR is denoted by a black arrow. n=3 of independent experiments.

**b)** Phostag immunoblot of phosphorylation of hPUM-C with an antibody specific for phosphorylated IRE1 (anti-rabbit Phospho-IRE1). The specificity of phosphorylation was monitored by treatment with  $\lambda$ PP or incubation with specific inhibitors of IRE1 $\alpha$  kinase activity (Apy29 and compound #18) and a reaction lacking ATP (first lane). The phosphorylation state of hIRE1 $\alpha$  KR is decreased in control reactions as expected compared to the reactions containing hIRE1 $\alpha$ +ATP or hIRE1 $\alpha$ +hPUM-C+ATP. An additional control was made by conducting a kinase assay of hPUM-C without incubation with the hIRE1 $\alpha$  KR domain. M – Protein molecular weight marker lane. n  $\geq$  2 of independent experiments. Source data file is provided.

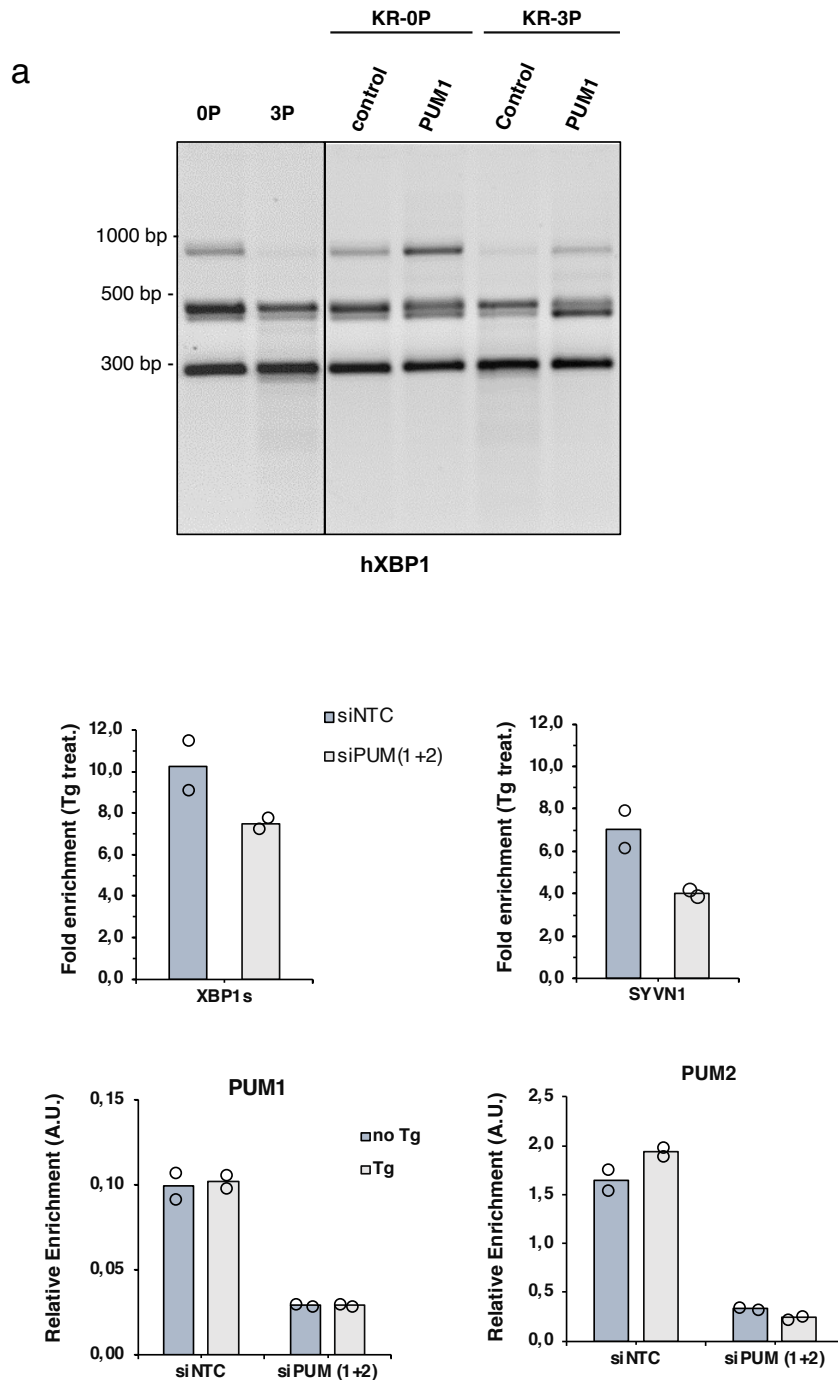

#### Supplementary Figure 4 – PUM1 protects human XBP1 from regulated Ire1-dependent decay

**a)** *In vitro* transcripts of human XBP1 were incubated with non-phosphorylated (0P) and phosphorylated (3P) forms of purified hIRE1 $\alpha$  KR. Human PUM1 FL protects XBP1 RNA from Ire1 dependent non-canonical decay, but does not impair IRE1 dependent XBP1 splicing. n = 3 of independent experiments.

**b)** RT-qPCRs for human XBP1s and the XBP1s target SYVN1 from human MDA-MB-231 cells treated with Thapsigargin (Tg) or vehicle control (DMSO) after transfection with a non-targeting control (siNTC) siRNA, or siRNAs for PUM1 and PUM2 (siPUM1+2). Knock-down efficiency of siPUM1+2 was evaluated by RT-qPCR for PUM1 and PUM2. n = 2 biological independent experiments. Source data file is provided.

Supplementary Table 1

| Primers used for plasmids and mutants used in this study |                                                                                                                  |                                                                                                                                                                                                                                                                                       |                        |
|----------------------------------------------------------|------------------------------------------------------------------------------------------------------------------|---------------------------------------------------------------------------------------------------------------------------------------------------------------------------------------------------------------------------------------------------------------------------------------|------------------------|
| <b>Pum D1-V5-H6</b><br>in plZ                            | FW dom.1 + pcma PUM<br>Rev. dom.1 + pcma PUM                                                                     | CGAATTTAAAGCTTCAAAATGAAGTTTTGGGTG<br>GCCCTCTAGACTCTCTGCAGGTGATGGTTG                                                                                                                                                                                                                   |                        |
| <b>PumD3-V5-H6</b><br>in plZ                             | Fw pcmb + dom. 3 PUM<br>Rev. Fw pcmb + dom. 3 PUM                                                                | CGAATTTAAAGCTTCAAAATGTATGGCGTAGCACCATGG<br>GCCCTCTAGACTCTCTGGCTGTGGGGCAC                                                                                                                                                                                                              |                        |
| <b>Pum D1D3-V5-H6</b><br>in plZ                          | FW dom.1 + pcma PUM<br>Rev. Fw pcmb + dom. 3 PUM                                                                 | CGAATTTAAAGCTTCAAAATGAAGTTTTGGGTG<br>GCCCTCTAGACTCTCTGGCTGTGGGGCAC                                                                                                                                                                                                                    |                        |
| <b>PumilioV5-H6</b><br>in pET26b                         | Nde1-pumilio Fw<br>EcoR1-V5His6Pum                                                                               | GGATCCATATGAAGTTTTGGGTGTAACGATG<br>GGAATCCAGTCAGATAAACTCAATGGTG                                                                                                                                                                                                                       |                        |
| <b>PumD3-V5-H6</b><br>in pET26b                          | Nde1-D3<br>EcoR1-V5His6Pum                                                                                       | GGATCCATATGTATGGCGTAGCACC<br>GGAATCCAGTCAGATAAACTCAATGGTG                                                                                                                                                                                                                             |                        |
| <b>PumHD-V5-H6</b><br>in pET26b                          | Nde1-PumHD FW<br>EcoR1-V5His6Pum                                                                                 | GGATCCATATGAGATCTCGCCTCTCGAAG<br>GGAATCCAGTCAGATAAACTCAATGGTG                                                                                                                                                                                                                         |                        |
| <b>Pum D1D3-V5-H6</b><br>pET26b                          | Nde1-pumilio Fw<br>EcoR1-V5His6Pum                                                                               | GGATCCATATGAAGTTTTGGGTGTAACGATG<br>GCCCTCTAGACTCTCTGGCTGTGGGGCAC                                                                                                                                                                                                                      |                        |
| <b>Xbp1-3'UTR</b>                                        | Xbp1-BamHI<br>Xbp1-3'UTR un FW<br>Xbp1-3'UTR sp FW<br>Xbp1-revGH                                                 | CGGGATCCCTTATATTTTGAATATTTTGTAG<br>cggtaccATGTTGAGCAGGAACAGG<br>cggtaccGTTTTTGTAGTTGATAGGCTG<br>gctctagaGcGTGACACTATAGAAGCTCGAG                                                                                                                                                       |                        |
| <b>PumPRE Mutants</b><br>in pRM-GFP                      | PumS3-R<br>PumS3-Fmut<br>Pum s1 Fw<br>Pum s1 rev mut                                                             | TAATCATAAGCCTATGTGGTTAGAG<br>CTCTTATAacaAcaATTGTGCTCAAAG<br>GCTTTATATGATACTGTAGTTAGAGCG<br>CTTCGATTATGAATTTATGTTGTGCCTATC                                                                                                                                                             |                        |
| <b>new reporter</b>                                      | RV xbp1 HA                                                                                                       | ggc tog cat aat ctg gaa cat cgt acg ga t aat aaG ATA TCT GCG AGC AGA CTT TCG GC                                                                                                                                                                                                       |                        |
| <b>Xbp1-HA-GFP</b>                                       | FW xbp1 HA<br>eGfp-stop -fw<br>eGFP-stop-rev<br>eGFP-ecoR5 Fw<br>eGfp-stop -fw<br>eGFP-stop-rev<br>eGFP-ecoR5 Fw | tat cag tac gat gtt cca gat tat gog ag c ctc tGA CCC CGG TCG CCA CCA TGG TGA GC<br>GGACTCAGATCTCGAGGGTACCGATCTG<br>GGTACCCCTCGAGATCTGAGTCTTACTTGT<br>GGGATATCGTGAGCAAGGGCGAGGAGCTG<br>GGACTCAGATCTCGAGGGTACCGATCTG<br>GGTACCCCTCGAGATCTGAGTCTTACTTGT<br>GGGATATCGTGAGCAAGGGCGAGGAGCTG |                        |
| <b>Pumilio phosphomutants</b>                            | FwmutT537A<br>T537A; S540A;S544A<br>S902A                                                                        | GGC TTC AAT CGC GCA CCT GGT GCA CGT CAA CCA GCA CCT GCA GAG<br>CTC TGC AGG TGC TGG TTG ACG TGC ACC AGG TGC GCG ATT GAA GCC<br>CGTTGACGGGTCGCCGCGACGCTTCGACCCGAGCACC<br>GGTGCTGCGGTGCAAGGCGTCCGCCGACCCGCTCAACG                                                                         |                        |
|                                                          | Mut Dom1 nFW<br>MutDom1 nREV<br>MutDom3A nFW<br>MutDom3A nREV                                                    | GCC GAT TCG ACT TGC GCC AAA GTG GTT G<br>GGG GGC CAG TAT GCC CGC ATT GCC GCT<br>CCC GCC CAG CAG GGT GCC GAG AAT C<br>GGC GAG GGG GCG GCG CGG CTG CGT T                                                                                                                                |                        |
| qPCR primers used                                        |                                                                                                                  | Target                                                                                                                                                                                                                                                                                |                        |
| GFP-FW1                                                  | GGCTACGTCGAGGCGCACCATCTT                                                                                         | gfp                                                                                                                                                                                                                                                                                   |                        |
| GFP-FW2                                                  | AGACCCCAACGAGAAGCG                                                                                               | gfp                                                                                                                                                                                                                                                                                   |                        |
| Xbp1 intron                                              | GGGTGACGCTTTGGATGCTGCAGA                                                                                         | Unspliced                                                                                                                                                                                                                                                                             |                        |
| Xbp1 FUns                                                | CCAGACATCGCGTGACCGCAAG                                                                                           | Unspliced /spliced                                                                                                                                                                                                                                                                    |                        |
| Xbp1 RUnsSp                                              | CACAACCTTCCAGAGTGAGGCCAG                                                                                         | Unspliced /Spliced                                                                                                                                                                                                                                                                    |                        |
| RP49-Fc1                                                 | AGATCGTGAAGAAGCGCACCAAGC                                                                                         | RP49                                                                                                                                                                                                                                                                                  |                        |
| RP49-Fc2                                                 | GCACCAGGAACCTTCTGAATCCGG                                                                                         | RP49                                                                                                                                                                                                                                                                                  |                        |
| Rev2 xbp1 spl/Uns                                        | GCGCTTGACGTCGAACCTTCTCGT                                                                                         | Spliced                                                                                                                                                                                                                                                                               |                        |
| Intron fw xbp1                                           | CTGCAGCATCCAAGCTGACCC                                                                                            | Unspliced                                                                                                                                                                                                                                                                             |                        |
| xbp1 spliced fw                                          | CCAACCTTGGACCGCAGGG                                                                                              | spliced                                                                                                                                                                                                                                                                               |                        |
| xbp1s_Fw2                                                | CCAACCTTGGATCTGCCGCA                                                                                             | spliced                                                                                                                                                                                                                                                                               |                        |
| xbp1S_Fw3                                                | CAACCTTGGATCTGCCGCAAGGTA                                                                                         | spliced                                                                                                                                                                                                                                                                               |                        |
| rp49_Fw3                                                 | CCCAAGATCGTGAAGAAGCGCACCAAGC                                                                                     | rp49                                                                                                                                                                                                                                                                                  |                        |
| rp49_rev4                                                | GCACGTTGTGACCAAGGAACCTTCTGAATCC                                                                                  | rp49                                                                                                                                                                                                                                                                                  |                        |
| Hsc3_forw                                                | TGTCACCGATCTGGTTCTTCAGGC                                                                                         | Hsc3                                                                                                                                                                                                                                                                                  |                        |
| Hsc3_rev                                                 | GTCCCATGACCAAGGACAAACATC                                                                                         | Hsc3                                                                                                                                                                                                                                                                                  |                        |
| Acat2-fw-qPCR                                            | CATCACTGCCGAGAATCTG                                                                                              | Acat2                                                                                                                                                                                                                                                                                 |                        |
| Acat2-rv-qPCR                                            | CTGAGCTTCTGTATACCCCTCG                                                                                           | Acat2                                                                                                                                                                                                                                                                                 |                        |
| EMSA assays                                              |                                                                                                                  |                                                                                                                                                                                                                                                                                       |                        |
| RNA oligos                                               |                                                                                                                  |                                                                                                                                                                                                                                                                                       |                        |
| Name                                                     | Sequence                                                                                                         | Bases                                                                                                                                                                                                                                                                                 | End Modification 3'    |
| pum1 site-wt-3BioTEG                                     | GAUAGGCUGUACAUAAAUAUAUUCG                                                                                        | 27                                                                                                                                                                                                                                                                                    | Biotin-TEG             |
| pum1 site-wt                                             | GAUAGGCUGUACAUAAAUAUAUUCG                                                                                        | 27                                                                                                                                                                                                                                                                                    |                        |
| pum1 site-mut                                            | GAUAGGCACACAUAAAUAUAUUCG                                                                                         | 27                                                                                                                                                                                                                                                                                    |                        |
| Reagents/Kits                                            |                                                                                                                  |                                                                                                                                                                                                                                                                                       |                        |
| Designation                                              | Source or reference                                                                                              | Identifiers                                                                                                                                                                                                                                                                           | Additional information |
| Amersham™ Hybon N+                                       | GE Healthcare                                                                                                    | RPN2222B                                                                                                                                                                                                                                                                              |                        |
| ECL Streptavidin-HRP Amersham™                           | GE Healthcare                                                                                                    | RPN 1231                                                                                                                                                                                                                                                                              | (1:1000)               |
| 1xTBS 1% Casein blocker                                  | BIO-RAD                                                                                                          | #1610782                                                                                                                                                                                                                                                                              |                        |
| Primers used for dsRNAi experiments                      |                                                                                                                  |                                                                                                                                                                                                                                                                                       |                        |
| T7 primer                                                | TAATACGACTCACTATAGGG                                                                                             |                                                                                                                                                                                                                                                                                       |                        |
| T7-mai Pum Fw                                            | cgTAATACGACTCACTATAGGGgaaactcctctoga atcgc                                                                       |                                                                                                                                                                                                                                                                                       |                        |
| T7-mai Pum Rv                                            | cgTAATACGACTCACTATAGGGatcgtaggtaattca tgcagc                                                                     |                                                                                                                                                                                                                                                                                       |                        |
| PUM Fw                                                   | gaaactcctctogaatcgc                                                                                              |                                                                                                                                                                                                                                                                                       |                        |
| PUM Rev                                                  | atcgtaggtaattcatgcagc                                                                                            |                                                                                                                                                                                                                                                                                       |                        |
| T7-Rnai LacZ Fw                                          | GGATCCTAATACGACTCACT ATAGGGTGACGTCTCGTTGCTGCATAAAC                                                               |                                                                                                                                                                                                                                                                                       |                        |
| T7-RNAi LacZ ReV                                         | GGATCCTAATACGACTCACTATAGGGGGCGTTAAAGTTGTTCT GCTTCATC                                                             |                                                                                                                                                                                                                                                                                       |                        |

Supplementary Table 2

| Designation                                                                                                   | Source or reference                                               | Identifiers                           | Additional information |
|---------------------------------------------------------------------------------------------------------------|-------------------------------------------------------------------|---------------------------------------|------------------------|
| <b>Antibodies</b>                                                                                             |                                                                   |                                       |                        |
| V5 Tag Antibody (mouse monoclonal)                                                                            | Invitrogen                                                        | (R960-25);<br>RRID: AB_2556564        | 1:1000-1:5000          |
| TAP-tag Antibody (Rabbit-pAb)                                                                                 | GenScript                                                         | #A00683                               | 1:2000                 |
| ELAV (Anti-Rat)                                                                                               | Developmental Studies Hybridoma Bank (DSHB),                      | DSHB Cat# 1ea<br>AB_528217            | (1:400)                |
| anti-alpha-tubulin (mouse monoclonal)                                                                         | Developmental Studies Hybridoma Bank (DSHB),                      | DSHB Cat# 12G10<br>RRID: AB_1157911   | (1:50)                 |
| Anti-HA (mouse monoclonal)                                                                                    | Biologend Clone [16B12]                                           | Covance Catalog# MMS-101R             | (1:2000)               |
| Anti-HA (rat monoclonal)                                                                                      | Chromotek Clone [7C9]                                             | HA antibody [7C9]<br>RRID: AB_2631399 | (1:1000)               |
| Anti-GFP (rat monoclonal)                                                                                     | Chromotek Clone [3H9]                                             | 3h9-100<br>RRID: AB_10773374          | (1:1000)               |
| Ire1 Phospho                                                                                                  | Genentech                                                         | NA                                    | (1:1000)               |
| Anti-mouse IgG HRP                                                                                            | GE Healthcare                                                     | NXA931                                | (1:5000)               |
| Anti-Rabbit IgG HRP                                                                                           | Sigma                                                             | A8275                                 | (1:10000)              |
| Anti-Rat IgG HRP                                                                                              | Sigma                                                             | A9037                                 | (1:2000)               |
| Cy3-conjugated donkey anti-rabbit IgG (H+L)                                                                   | Jackson ImmunoResearch laboratories                               | #711-165-152                          | (1:400)                |
| Cy3 AffiniPure Donkey Anti-Rat IgG (H+L)                                                                      | Jackson ImmunoResearch laboratories                               | #712-165-150                          | (1:400)                |
| Cy3-conjugated donkey anti-mouse                                                                              | Jackson ImmunoResearch laboratories                               | #715-165-150                          | (1:400)                |
| Alexa Fluor® 488 AffiniPure Donkey Anti-Mouse IgG (H+L)                                                       | Jackson ImmunoResearch laboratories                               | 715-545-151                           | (1:400)                |
| Goat anti-Rabbit IgG Dye 650                                                                                  | Advansta                                                          | R-05761-250                           | (1:400)                |
| Alexa Fluor® 647 AffiniPure Donkey Anti-Rat IgG (H+L)                                                         | Jackson ImmunoResearch laboratories                               | 712-605-153                           | (1:400)                |
| Alexa Fluor® 647 AffiniPure Donkey Anti-Mouse IgG (H+L)                                                       | Jackson ImmunoResearch laboratories                               | 715-605-151                           | (1:400)                |
| Goat anti-Mouse IgG Dye 650                                                                                   | Advansta                                                          | R-05764-250                           | (1:400)                |
| <b>Reagents/Kits</b>                                                                                          |                                                                   |                                       |                        |
| NucleoBond® Xtra Midi kit for transfection-grade plasmid DNA                                                  | MACHEREY-NAGEL                                                    | MN740410                              |                        |
| NZYMiniprep                                                                                                   | nzytech                                                           | MB01002                               |                        |
| NZY Total RNA isolation kit                                                                                   | nzytech                                                           | MB13402                               |                        |
| TRizol™ Reagent                                                                                               | Invitrogen                                                        | #15596026                             |                        |
| RiboMAX™ Large Scale RNA Production System                                                                    | Promega                                                           | # P1300                               |                        |
| RNA Clean & Concentrator™ -5                                                                                  | Zymo Research                                                     | R1015                                 |                        |
| RNasin® Ribonuclease Inhibitor                                                                                | Promega                                                           | N2511                                 |                        |
| Amersham™ Hybond PVDF Blotting Membrane                                                                       | GE Healthcare                                                     | # 10600021                            |                        |
| Amersham™ ECL Chemiluminescent HRP Substrate                                                                  | GE Healthcare                                                     | RPN2232                               |                        |
| ATP, [γ-32P]- 3000Ci/mmol, 250µCi, 5mCi/mL                                                                    | PerkinElmer                                                       | PELSBLU502H250UC                      |                        |
| Amersham Hyperfilm™ ECL                                                                                       | GE Healthcare                                                     | #28906836                             |                        |
| Microseal B Adhesive Seals                                                                                    | BIO-RAD                                                           | MSB-1001                              |                        |
| iCycler iQ® PCR Plates 96-well                                                                                | BIO-RAD                                                           | # 2239441                             |                        |
| Effectene Transfection Reagent                                                                                | QIAGEN                                                            | # 1054250                             |                        |
| Penicillin/streptomycin                                                                                       | ThermoFisher Scientific                                           | Cat#15140122                          |                        |
| FBS Hyclone                                                                                                   | Biowest                                                           | SV30160.03                            |                        |
| Schneider's medium                                                                                            | Biowest                                                           | L0207-500                             |                        |
| NZYColour Protein Marker II                                                                                   | nzytech                                                           | MB09002                               |                        |
| cComplete™, Mini, EDTA-free Protease Inhibitor Cocktail                                                       | Roche                                                             | 4693159001                            |                        |
| Phos-tag™ Acrylamide NARD institute                                                                           | Wako-Chem Europe GmbH                                             | AAL-107                               |                        |
| Halt Protease & Phosphatase Inhibitor Cocktail, EDTA free                                                     | Thermo Scientific                                                 | #78441                                |                        |
| 40% Acrylamide/Bis Solution 29:1                                                                              | BIO-RAD                                                           | #1610146                              |                        |
| 4–20% Mini-PROTEAN® TGX™ Precast Protein Gel                                                                  | BIO-RAD                                                           | #456-1085                             |                        |
| 7% Mini-PROTEAN® TGX™ Precast Protein Gel                                                                     | BIO-RAD                                                           | #456-1025                             |                        |
| Slide-A-Lyzer MINI Dialysis devices                                                                           | Thermo Scientific                                                 | #88404                                |                        |
| Amicon Ultra Centrifugal filter Devices                                                                       | Merck                                                             | 10K, 30K, 50K                         |                        |
| Rabbit IgG agarose beads                                                                                      | Sigma                                                             | A2909                                 |                        |
| Ni-NTA Resin                                                                                                  | G biosciences                                                     | #186-939                              |                        |
| V5 tagged Protein Purification Kit                                                                            | MBL                                                               | code: 3317                            |                        |
| NZYTag DNA polymerase                                                                                         | nzytech                                                           | MB00101                               |                        |
| Pfu DNA Polymerase                                                                                            | Fermentas                                                         | #EP0501                               |                        |
| Phusion High-Fidelity DNA Polymerase                                                                          | ThermoFisher Scientific                                           | F-530S                                |                        |
| NZYMutagenesis kit                                                                                            | nzytech                                                           | MB01201                               |                        |
| GreenSafe Premium                                                                                             | nzytech                                                           | MB13201                               |                        |
| GeneRuler 1kB DNA Ladder                                                                                      | ThermoScientific                                                  | #SM0311                               |                        |
| T4 Polynucleotide Kinase                                                                                      | NEB                                                               | M0201S                                |                        |
| T4 DNA Ligase                                                                                                 | NEB                                                               | M0202S                                |                        |
| lambda phosphatase                                                                                            | NEB                                                               | P0753S                                |                        |
| Amgen Compound #18                                                                                            | Genentech                                                         |                                       |                        |
| Subtilinb                                                                                                     | Sigma-Aldrich                                                     | PZ0012                                |                        |
| Apy29                                                                                                         | MedChemTronica                                                    | HY-17537                              |                        |
| 4u8c                                                                                                          | Sigma-Aldrich                                                     | SML0949                               |                        |
| Actinomycin D                                                                                                 | Sigma                                                             | A1410                                 |                        |
| Vectashield Mounting medium with DAPI                                                                         | Vector Laboratories,<br>RRID:SCR_000821                           | VectorLabs: H-1200                    |                        |
| <b>Software</b>                                                                                               |                                                                   |                                       |                        |
| FUJII <a href="http://fjii.sc/">http://fjii.sc/</a>                                                           | <a href="http://fjii.sc/">http://fjii.sc/</a>                     | RRID:SCR_002285)                      |                        |
| GraphPad Prism                                                                                                | <a href="https://www.graphpad.com/">https://www.graphpad.com/</a> | free trial                            |                        |
| <a href="https://astatsa.com/OneWay_Anova_with_TukeyHSD/">https://astatsa.com/OneWay_Anova_with_TukeyHSD/</a> | astatsa.com                                                       | 2016 Navendu Vasavada                 |                        |
| Image Lab Software for Mac Version 6.1                                                                        | Bio-RAD                                                           | SOFT-LIT-170-9690-ILSMAC-V-6-1        |                        |
| CFX Manager™ Software                                                                                         | Bio-RAD                                                           | 1845001                               |                        |
| Microsoft Excel version16.55                                                                                  | ©2021Microsoft                                                    |                                       |                        |

**Supplementary Table 3 - MIQE checklist**

| ITEM TO CHECK                                                        | IMPORTANCE | CHECKLIST                                                                                                               |
|----------------------------------------------------------------------|------------|-------------------------------------------------------------------------------------------------------------------------|
| <b>EXPERIMENTAL DESIGN</b>                                           |            |                                                                                                                         |
| Definition of experimental and control groups                        | E          | Non-targeting control (NTC), dsRNA against Pumilio versus control,                                                      |
| Number within each group                                             | E          | 3-6 biological replicates and 3 technical replicates                                                                    |
| Assay carried out by core lab or investigator's lab?                 | D          | Investigator's lab                                                                                                      |
| Acknowledgement of authors' contributions                            | D          |                                                                                                                         |
| <b>SAMPLE</b>                                                        |            |                                                                                                                         |
| Description                                                          | E          | Dmel-2 cells (S2 derivative); control and samples treated with dsRNAs                                                   |
| Volume/mass of sample processed                                      | D          | 0.5 ml Dmel-2 cells (0.5-1 x10 <sup>6</sup> cells) used in RNA isolation                                                |
| Microdissection or macrodissection                                   | E          | n/a (cell culture)                                                                                                      |
| Processing procedure                                                 | E          | Investigator's lab                                                                                                      |
| If frozen - how and how quickly?                                     | E          | cells processed immediately for RNA isolation, using RNA kit                                                            |
| If fixed - with what, how quickly?                                   | E          | n/a                                                                                                                     |
| Sample storage conditions and duration (especially for FFPE samples) | E          | na                                                                                                                      |
| <b>NUCLEIC ACID EXTRACTION</b>                                       |            |                                                                                                                         |
| Procedure and/or instrumentation                                     | E          | kit RNA extraction                                                                                                      |
| Name of kit and details of any modifications                         | E          | NZY Total RNA isolation kit (nzytech) / Quick-RNA MiniPrep (Zymo Research)                                              |
| Source of additional reagents used                                   | D          |                                                                                                                         |
| Details of DNase or RNase treatment                                  | E          | 1ul Turbo DNA (Ambion) per sample                                                                                       |
| Contamination assessment (DNA or RNA)                                | E          | qPCR on RNA after turbo DNase treatment control in qPCR (no RT)                                                         |
| Nucleic acid quantification                                          | E          | Nanodrop One                                                                                                            |
| Instrument and method                                                | E          | Nanodrop One                                                                                                            |
| Purity (A260/A280)                                                   | D          | 1.8 to 2.0                                                                                                              |
| Yield                                                                | D          | 1-2ug total RNA                                                                                                         |
| RNA integrity method/instrument                                      | E          | RNA quality evaluated with electrophoresis                                                                              |
| RIN/RQI or Cq of 3' and 5' transcripts                               | E          | N/A (used gel electrophoresis)                                                                                          |
| Electrophoresis traces                                               | D          |                                                                                                                         |
| Inhibition testing (Cq dilutions, spike or other)                    | E          | Dilutions (standard curve efficiencies)                                                                                 |
| <b>REVERSE TRANSCRIPTION</b>                                         |            |                                                                                                                         |
| Complete reaction conditions                                         | E          | RevertAid H Minus First Strand cDNA Synthesis Kit (Thermo/Fermentas)                                                    |
| Amount of RNA and reaction volume                                    | E          | 0.5 to 1 µg RNA for RT, and 500 ng to 1 µg noRT 20 µl reaction volume                                                   |
| Priming oligonucleotide (if using GSP) and concentration             | E          | Random hexamers from 500 ng/µl stock - 50 ng/µl in annealing, 25 ng/µl final in 20 µl                                   |
| Reverse transcriptase and concentration                              | E          | 2 U/µl                                                                                                                  |
| Temperature and time                                                 | E          | 42° C for 45 minutes                                                                                                    |
| Manufacturer of reagents and catalogue numbers                       | D          | Thermo Scientific (K1632)                                                                                               |
| Cqs with and without RT                                              | D*         | 25ng of RNA sample after turboDNase treatment, C                                                                        |
| Storage conditions of cDNA                                           | D          | stored at -20° C                                                                                                        |
| <b>qPCR TARGET INFORMATION</b>                                       |            |                                                                                                                         |
| If multiplex, efficiency and LOD of each assay.                      | E          | n/a                                                                                                                     |
| Sequence accession number                                            | E          | Provided in qPCR primer information table                                                                               |
| Location of amplicon                                                 | D          |                                                                                                                         |
| Amplicon length                                                      | E          | Provided in qPCR primer information table                                                                               |
| <i>In silico</i> specificity screen (BLAST, etc)                     | E          | NCBI Primer-BLAST ; Flymai.org                                                                                          |
| Pseudogenes, retropseudogenes or other homologs?                     | D          |                                                                                                                         |
| Sequence alignment                                                   | D          |                                                                                                                         |
| Secondary structure analysis of amplicon                             | D          |                                                                                                                         |
| Location of each primer by exon or intron (if applicable)            | E          | Provided in qPCR primer information table                                                                               |
| What splice variants are targeted?                                   | E          | Provided in qPCR primer information table                                                                               |
| <b>qPCR OLIGONUCLEOTIDES</b>                                         |            |                                                                                                                         |
| Primer sequences                                                     | E          | Provided in qPCR primer information table                                                                               |
| RTPrimerDB Identification Number                                     | D          |                                                                                                                         |
| Probe sequences                                                      | D**        |                                                                                                                         |
| Location and identity of any modifications                           | E          | n/a                                                                                                                     |
| Manufacturer of oligonucleotides                                     | D          | Stabvida <a href="https://www.stabvida.com">https://www.stabvida.com</a>                                                |
| Purification method                                                  | D          | Standard Desalting                                                                                                      |
| <b>qPCR PROTOCOL</b>                                                 |            |                                                                                                                         |
| Complete reaction conditions                                         | E          | Standard reaction conditions recommended by SyberGreen (BioRad)                                                         |
| Reaction volume and amount of cDNA/DNA                               | E          | 10 µl reaction volume, 1/40 of cDNA from the 20µl cDNA reaction                                                         |
| Primer, (probe), Mg <sup>++</sup> and dNTP concentrations            | E          | 0.1 µM each primer, MgCl <sub>2</sub> and dNTP concentration proprietary (Biorad)                                       |
| Polymerase identity and concentration                                | E          | SsoAdvanced Universal SYBR Green Supermix ( 2x concentrated, and contain dNTPs, MgCl <sub>2</sub> , and DNA polymerase) |
| Buffer/kit identity and manufacturer                                 | E          | Biorad Cat N° 1725271                                                                                                   |
| Exact chemical constitution of the buffer                            | D          | Exact buffer composition proprietary (Biorad)                                                                           |
| Additives (SYBR Green I, DMSO, etc.)                                 | E          | SYBR Green                                                                                                              |
| Manufacturer of plates/tubes and catalog number                      | D          | BioRad, catalogue #HSP9601                                                                                              |
| Complete thermocycling parameters                                    | E          | Reported in Methods section                                                                                             |
| Reaction setup (manual/robotic)                                      | D          | Manual                                                                                                                  |
| Manufacturer of qPCR instrument                                      | E          | BioRad                                                                                                                  |
| <b>qPCR VALIDATION</b>                                               |            |                                                                                                                         |
| Evidence of optimisation (from gradients)                            | D          | Standard curves initially performed with Ta 65°C, then gradient or alternative Ta performed if efficiency not bet       |
| Specificity (gel, sequence, melt, or digest)                         | E          | Melt curves; amplicons were also evaluated using gel electrophoresis                                                    |
| For SYBR Green I, Cq of the NTC                                      | E          | Below detection limit (N/A for all primers)                                                                             |
| Standard curves with slope and y-intercept                           | E          | Performed standard curves for all primer sets; slope and y-intercept provided in qPCR primer information table          |
| PCR efficiency calculated from slope                                 | E          | Efficiencies were between 84.7% and 103.9% and are provided in qPCR primer information table                            |
| Confidence interval for PCR efficiency or standard error             | D          |                                                                                                                         |
| r <sup>2</sup> of standard curve                                     | E          | Provided in qPCR primer information table                                                                               |
| Linear dynamic range                                                 | E          | All measurements made within the linear range of detection determined from standard curves                              |
| Cq variation at lower limit                                          | E          | All assays were performed within the linear range of the standard curve for each primer set                             |
| Confidence intervals throughout range                                | D          |                                                                                                                         |
| Evidence for limit of detection                                      | E          | All assays were performed within the linear range of the standard curve for each primer set                             |
| If multiplex, efficiency and LOD of each assay.                      | E          | N/A                                                                                                                     |
| <b>DATA ANALYSIS</b>                                                 |            |                                                                                                                         |
| qPCR analysis program (source, version)                              | E          | BioRad CFX Manager v 3.1; Fold change calculations done manually in Microsoft Excel                                     |
| Cq method determination                                              | E          | Pfaffl; not all primer sets within 5% efficiency of reference primer set                                                |
| Outlier identification and disposition                               | E          | N/A                                                                                                                     |
| Results of NTCs                                                      | E          | Below detection limit; Ct was "N/A" for all primer sets                                                                 |
| Justification of number and choice of reference genes                | E          | 1 (Rp49) - constitutive ribosomal subunit within desirable Ct range (15-25)                                             |
| Description of normalisation method                                  | E          | ddCT method                                                                                                             |
| Number and concordance of biological replicates                      | D          | 3-4 biological replicates                                                                                               |
| Number and stage (RT or qPCR) of technical replicates                | E          | 3 technical replicates, qPCR                                                                                            |
| Repeatability (intra-assay variation)                                | E          | Triplicate measurements (technical reps), 3 independent trials                                                          |
| Reproducibility (inter-assay variation, %CV)                         | D          |                                                                                                                         |
| Power analysis                                                       | D          |                                                                                                                         |
| Statistical methods for result significance                          | E          | Standard t-test (2-tailed, equal variance), reported in Source Data for each relevant figure                            |
| Software (source, version)                                           | E          | BioRad CFX Manager v 3.1                                                                                                |
| Cq or raw data submission using RDML                                 | D          | Cq values for individual samples can be found in Source data for each relevant figure                                   |

**Table 1.** MIQE checklist for authors, reviewers and editors. All essential information (E) must be submitted with the manuscript. Desirable information (D) should be submitted if available. If using primers obtained from RTPrimerDB, information on qPCR target, oligonucleotides, protocols and validation is available from that source.

\*: Assessing the absence of DNA using a no RT assay is essential when first extracting RNA. Once the sample has been validated as RDNA-free, inclusion of a no-RT control is desirable, but no longer essential.

\*\* : Disclosure of the probe sequence is highly desirable and strongly encouraged. However, since not all commercial pre-designed assay vendors provide this information, it cannot be an essential requirement. Use of such assays is advised against.
